# Supplementary material for: Core genome multilocus sequence typing (cgMLST) applicable to the monophyletic Klebsiella oxytoca species complex
Source: PubMed Central journal article supplement (PMC11237601; doi:10.1128/jcm.01725-23), 2024-05-23
Supplement: jcm.01725-23-s0001.pdf [file jcm.01725-23-s0001.pdf]

# 1 Supplementary

2

## 3 Methods

Supplementary Table 1: NCBI datasets used as Seed and Penetration query genomes for the generation of the preliminary cgMLST scheme for the *K. oxytoca* complex with the SeqSphere+ Target Definer. No isolates with MLST STs included in BAPS partition 1 (ST272, 273, 274, 276) were available in pubMLST database, also there was no hit within analyzed NCBI datasets (n=880). FastANI similarity is calculated with the respective reference of the species as mentioned in the methods.

| BAPS partition | Strain        | Species                 | FastANI similarity (%) to reference | MLST ST | Genome Status  | Genome Accession |
|----------------|---------------|-------------------------|-------------------------------------|---------|----------------|------------------|
| BAPS2          | FDAARGOS_500* | <i>K. oxytoca</i>       | 100,00                              | 59      | CompleteGenome | NZ_CP033844.1    |
| BAPS3          | M5a1          | <i>K. grimontii</i>     | 99,38                               | 104     | CompleteGenome | NZ_CP063301.1    |
| BAPS4          | Kox205        | <i>K. pasteurii</i>     | 100,00                              | 300     | CompleteGenome | NZ_CP089403.1    |
| BAPS5          | 5088          | <i>K. michiganensis</i> | 98,69                               | 11      | CompleteGenome | NZ_CP103554.1    |
| BAPS6          | F107          | <i>K. michiganensis</i> | 98,06                               | 383     | CompleteGenome | NZ_CP024643.1    |
| BAPS7          | BSI-KPN166    | <i>K. michiganensis</i> | 99,05                               | 40      | CompleteGenome | CP102103.1       |

4 \* strain used as seed

5

## 6 Results

7

8 The neighbour joining tree (Supplementary Figure 1, compare to Figure 2 in Rønning *et al.* (30))

9 confirms NICU isolates from faecal specimens to be different from the outbreak strain, as well

10 as the similarity of the genotype of two environmental isolates from one sink.

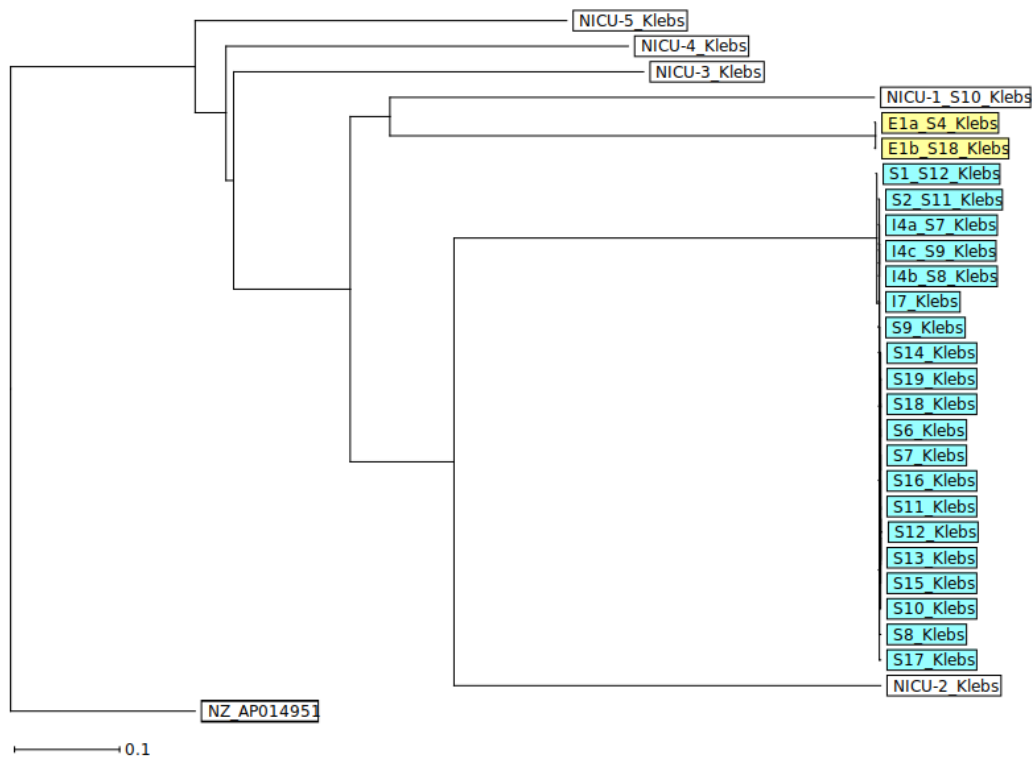

Supplementary Figure 1: Neighbour joining tree of 28 isolates from Norway and the reference strain used in their analyses (30). Yellow marked isolates are closely related environmental strains, cyan marked are outbreak isolates and unmarked isolates are control isolates.

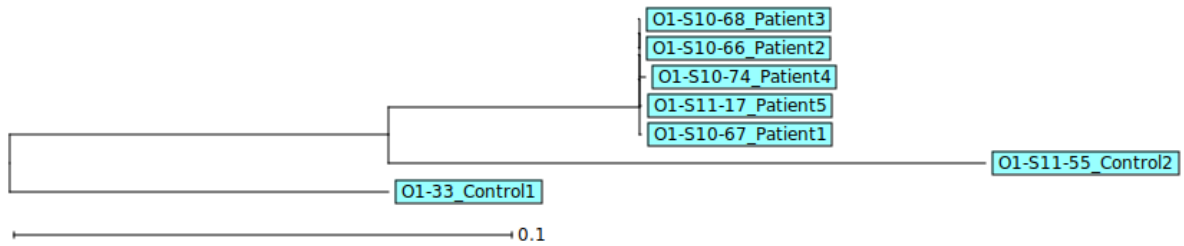

11 *Supplementary Figure 2: Neighbour joining tree of seven Graz isolates from 2010 (4) including*  
 12 *the two control isolates. Patient isolates form a cluster separated from the two controls.*  
 13

14 For further evaluation of our cgMLST scheme, we performed a SNP analysis of the Graz  
 15 outbreak. As shown in the trees in Supplementary Figures 3 and 4, both methods allow the  
 16 identification of the outbreak isolate cluster as a single branch (highlighted in blue) separated  
 17 from the controls. This reconfirms the suitability of the selected cgMLST approach for bacterial  
 18 typing purposes. Nevertheless, if necessary, SNP analyses still offer the highest discriminatory  
 19 power, as expected.

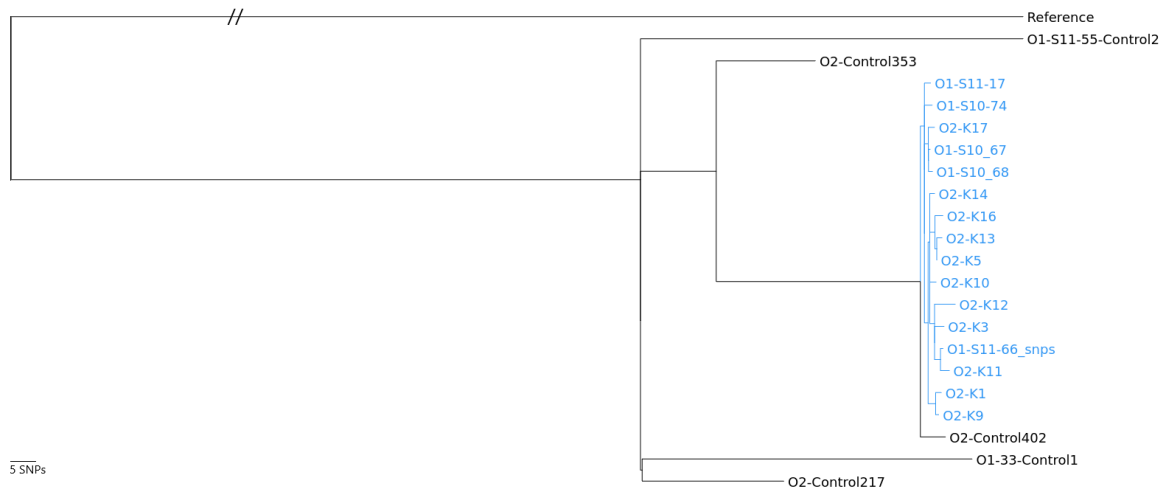

20 *Supplementary Figure 3: SNP-based neighbour joining tree of all Graz outbreak isolates shows*  
*the outbreak cluster as a single branch highlighted in blue that is separated from the controls.*  
*This tree is rooted to the same reference (NZ\_CP033844\_1) as the cgMLST-based tree below,*  
*but the distance to the reference is not up to scale for visualisation purposes.*

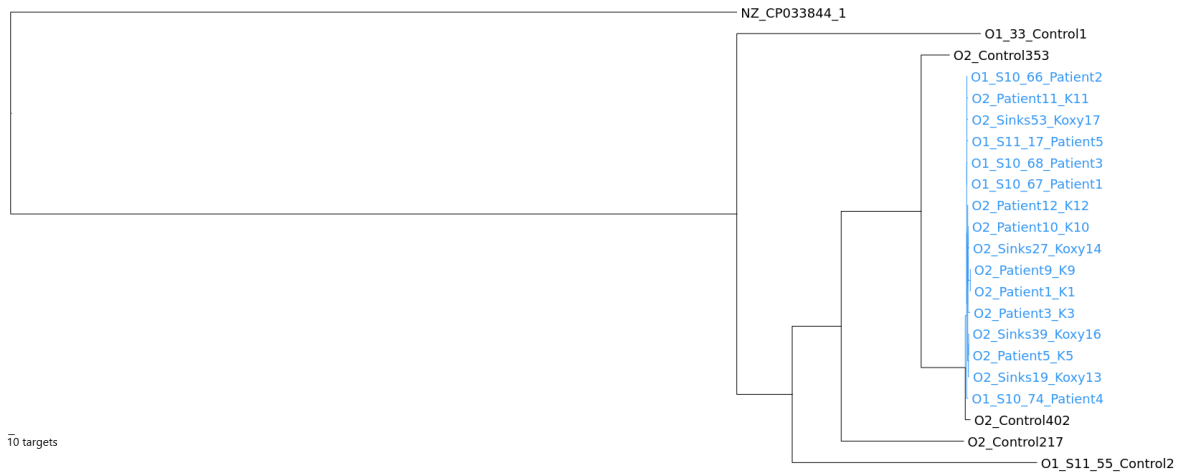

21

*Supplementary Figure 4: cgMLST-based neighbour joining tree of all Graz outbreak isolates shows the outbreak cluster as a single branch highlighted in blue that is separated from the controls. The tree is rooted to NZ\_CP033844\_1.*

22
