# Supplementary material for: Core genome multilocus sequence typing (cgMLST) applicable to the monophyletic Klebsiella oxytoca species complex
Source: PubMed Central journal article supplement (PMC11237601; doi:10.1128/jcm.01725-23), 2024-05-23
Supplement: jcm.01725-23-s0002.pdf [file jcm.01725-23-s0002.pdf]

Supplementary Table 2: A list of all examined isolates included in our study with their respective metadata like association to the different outbreaks and accession numbers. Also included are various cgMLST results like species assignment via the blaOXY gene assignment (as mentioned in the results) and mash screen, missing values in the cgMLST and the percentage of good targets of all the core genome targets. Also the sequence type and the alleles of the seven loci it consists of are listed.

| No. | Sample ID                 | Association (Reference)   | Relation to Outbreak | Accession           | acquired          | blaOXY      | Species (bla Oxy) | Top Species Match | #Missing values Core | #Missing values Accessory | Perc. Good Targets | Avg. Coverage (Assen ST) | gapA    | infB | mdh | pgi | phoE | rpoB    | tonB |     |
|-----|---------------------------|---------------------------|----------------------|---------------------|-------------------|-------------|-------------------|-------------------|----------------------|---------------------------|--------------------|--------------------------|---------|------|-----|-----|------|---------|------|-----|
| 1   | #306_neg                  | Graz strain collection    | -                    | SAMN39061525        | newly sequenced   | blaOXY_1-1  | K. michiganensis  | K. michiganensis  | 7                    | 1696                      | 99.7               | 145                      | 27      | 3    | 5   | 7   | 13   | 17      | 4    | 5   |
| 2   | #75_neg                   | Graz strain collection    | -                    | SAMN39061526        | newly sequenced   | blaOXY_1-1  | K. michiganensis  | K. michiganensis  | 1                    | 1675                      | 100                | 162                      | 11      | 3    | 5   | 7   | 8    | 11      | 6    | 5   |
| 3   | 15_neg                    | Graz strain collection    | -                    | SAMN39061527        | newly sequenced   | blaOXY_5-2  | K. michiganensis  | K. michiganensis  | 60                   | 1870                      | 97.6               | 126                      | 82      | 14   | 24  | 15  | 8    | 18      | 6    | 4   |
| 4   | 25_pos                    | Graz strain collection    | -                    | SAMN39061528        | newly sequenced   | blaOXY_6-1  | K. grimontii      | K. oxytoca        | 5                    | 1935                      | 99.8               | 146                      | 377     | 4    | 6   | 19  | 10   | 46      | 8    | 31  |
| 5   | #119_pos                  | Graz strain collection    | -                    | SAMN39061529        | newly sequenced   | blaOXY_1-20 | K. michiganensis  | K. michiganensis  | 3                    | 155                       | 95                 | 3                        | 8       | 17   | 7   | 20  | 6    | 13      |      |     |
| 6   | #21_neg                   | Graz strain collection    | -                    | SAMN39061530        | newly sequenced   | blaOXY_1-9  | K. michiganensis  | K. michiganensis  | 10                   | 1740                      | 99.6               | 140                      | 40      | 3    | 8   | 20  | 7    | 23      | 14   | 18  |
| 7   | #19_neg                   | Graz strain collection    | -                    | SAMN39061531        | newly sequenced   | blaOXY_2-21 | K. oxytoca        | K. oxytoca        | 7                    | 375                       | 99.7               | 163                      | 78      | 1    | 22  | 2   | 27   | 9       | 1    | 2   |
| 8   | #311_pos                  | Graz strain collection    | -                    | SAMN39061532        | newly sequenced   | blaOXY_6-2  | K. grimontii      | K. grimontii      | 7                    | 1967                      | 99.7               | 157                      | 216     | 4    | 6   | 19  | 10   | 46      | 24   | 31  |
| 9   | #335_pos                  | Graz strain collection    | -                    | SAMN39061533        | newly sequenced   | blaOXY_4-1  | K. pasteurii      | K. michiganensis  | 12                   | 2040                      | 99.5               | 146                      | new     | 17   | 23  | 23  | 39   | 69      | 30   | 43  |
| 10  | 21_neg                    | Graz strain collection    | -                    | SAMN39061534        | newly sequenced   | blaOXY_5-5  | K. michiganensis  | K. michiganensis  | 8                    | 1832                      | 99.7               | 176                      | 80      | 3    | 4   | 15  | 8    | 12      | 3    | 4   |
| 11  | #118_neg                  | Graz strain collection    | -                    | SAMN39061535        | newly sequenced   | blaOXY_2-1  | K. oxytoca        | K. oxytoca        | 2                    | 325                       | 99.9               | 154                      | 19      | 1    | 2   | 2   | 1    | 16      | 1    | 2   |
| 12  | #218_neg                  | Graz strain collection    | -                    | SAMN39061536        | newly sequenced   | blaOXY_2-21 | K. oxytoca        | K. oxytoca        | 5                    | 398                       | 99.8               | 144                      | 58      | 1    | 2   | 2   | 1    | 4       | 1    | 2   |
| 13  | S10_Klebs                 | Norway Outbreak (30)      | Outbreak Strain      | Rønning et al. (30) | provided as fastq | blaOXY_2-2  | K. oxytoca        | K. oxytoca        | 2                    | 347                       | 99.9               | 113                      | 179     | 1    | 36  | 2   | 1    | 66      | 2    | 2   |
| 14  | S11_Klebs                 | Norway Outbreak (30)      | Outbreak Strain      | Rønning et al. (30) | provided as fastq | blaOXY_2-2  | K. oxytoca        | K. oxytoca        | 1                    | 347                       | 100                | 120                      | 179     | 1    | 36  | 2   | 1    | 66      | 2    | 2   |
| 15  | S12_Klebs                 | Norway Outbreak (30)      | Outbreak Strain      | Rønning et al. (30) | provided as fastq | blaOXY_2-2  | K. oxytoca        | Escherichia coli  | 39                   | 353                       | 98.5               | 60                       | 179     | 1    | 36  | 2   | 1    | 66      | 2    | 2   |
| 16  | S13_Klebs                 | Norway Outbreak (30)      | Outbreak Strain      | Rønning et al. (30) | provided as fastq | blaOXY_2-2  | K. oxytoca        | K. oxytoca        | 1                    | 346                       | 100                | 118                      | 179     | 1    | 36  | 2   | 1    | 66      | 2    | 2   |
| 17  | S14_Klebs                 | Norway Outbreak (30)      | Outbreak Strain      | Rønning et al. (30) | provided as fastq | blaOXY_2-2  | K. oxytoca        | K. oxytoca        | 2                    | 348                       | 99.9               | 108                      | 179     | 1    | 36  | 2   | 1    | 66      | 2    | 2   |
| 18  | S15_Klebs                 | Norway Outbreak (30)      | Outbreak Strain      | Rønning et al. (30) | provided as fastq | blaOXY_2-2  | K. oxytoca        | K. oxytoca        | 1                    | 348                       | 100                | 129                      | 179     | 1    | 36  | 2   | 1    | 66      | 2    | 2   |
| 19  | S16_Klebs                 | Norway Outbreak (30)      | Outbreak Strain      | Rønning et al. (30) | provided as fastq | blaOXY_2-2  | K. oxytoca        | K. oxytoca        | 1                    | 346                       | 100                | 103                      | 179     | 1    | 36  | 2   | 1    | 66      | 2    | 2   |
| 20  | S17_Klebs                 | Norway Outbreak (30)      | Outbreak Strain      | Rønning et al. (30) | provided as fastq | blaOXY_2-2  | K. oxytoca        | K. oxytoca        | 2                    | 349                       | 99.9               | 97                       | 179     | 1    | 36  | 2   | 1    | 66      | 2    | 2   |
| 21  | S18_Klebs                 | Norway Outbreak (30)      | Outbreak Strain      | Rønning et al. (30) | provided as fastq | blaOXY_2-2  | K. oxytoca        | K. oxytoca        | 3                    | 349                       | 99.9               | 169                      | 179     | 1    | 36  | 2   | 1    | 66      | 2    | 2   |
| 22  | S19_Klebs                 | Norway Outbreak (30)      | Outbreak Strain      | Rønning et al. (30) | provided as fastq | blaOXY_2-2  | K. oxytoca        | K. oxytoca        | 3                    | 349                       | 99.9               | 168                      | 179     | 1    | 36  | 2   | 1    | 66      | 2    | 2   |
| 23  | S12_S12_Klebs             | Norway Outbreak (30)      | Outbreak Strain      | Rønning et al. (30) | provided as fastq | blaOXY_2-2  | K. oxytoca        | K. oxytoca        | 182                  | 567                       | 92.8               | 24                       | 179     | 1    | 36  | 2   | 1    | 66      | 2    | 2   |
| 24  | S2_S11_Klebs              | Norway Outbreak (30)      | Outbreak Strain      | Rønning et al. (30) | provided as fastq | blaOXY_2-2  | K. oxytoca        | K. oxytoca        | 12                   | 363                       | 99.5               | 93                       | 179     | 1    | 36  | 2   | 1    | 66      | 2    | 2   |
| 25  | S6_Klebs                  | Norway Outbreak (30)      | Outbreak Strain      | Rønning et al. (30) | provided as fastq | blaOXY_2-2  | K. oxytoca        | K. oxytoca        | 2                    | 348                       | 99.9               | 121                      | 179     | 1    | 36  | 2   | 1    | 66      | 2    | 2   |
| 26  | S7_Klebs                  | Norway Outbreak (30)      | Outbreak Strain      | Rønning et al. (30) | provided as fastq | blaOXY_2-2  | K. oxytoca        | K. oxytoca        | 2                    | 347                       | 99.9               | 129                      | 179     | 1    | 36  | 2   | 1    | 66      | 2    | 2   |
| 27  | S8_Klebs                  | Norway Outbreak (30)      | Outbreak Strain      | Rønning et al. (30) | provided as fastq | blaOXY_2-2  | K. oxytoca        | K. oxytoca        | 2                    | 348                       | 99.9               | 154                      | 179     | 1    | 36  | 2   | 1    | 66      | 2    | 2   |
| 28  | S9_Klebs                  | Norway Outbreak (30)      | Outbreak Strain      | Rønning et al. (30) | provided as fastq | blaOXY_2-2  | K. oxytoca        | K. oxytoca        | 2                    | 347                       | 99.9               | 118                      | 179     | 1    | 36  | 2   | 1    | 66      | 2    | 2   |
| 29  | W4_S7_Klebs               | Norway Outbreak (30)      | Outbreak Strain      | Rønning et al. (30) | provided as fastq | blaOXY_2-2  | K. oxytoca        | K. oxytoca        | 4                    | 352                       | 99.8               | 179                      | 179     | 1    | 36  | 2   | 1    | 66      | 2    | 2   |
| 30  | W4_S8_Klebs               | Norway Outbreak (30)      | Outbreak Strain      | Rønning et al. (30) | provided as fastq | blaOXY_2-2  | K. oxytoca        | K. oxytoca        | 2                    | 348                       | 99.9               | 69                       | 179     | 1    | 36  | 2   | 1    | 66      | 2    | 2   |
| 31  | W4_S9_Klebs               | Norway Outbreak (30)      | Outbreak Strain      | Rønning et al. (30) | provided as fastq | blaOXY_2-2  | K. oxytoca        | K. oxytoca        | 2                    | 348                       | 99.9               | 86                       | 179     | 1    | 36  | 2   | 1    | 66      | 2    | 2   |
| 32  | W7_Klebs                  | Norway Outbreak (30)      | Outbreak Strain      | Rønning et al. (30) | provided as fastq | blaOXY_2-2  | K. oxytoca        | K. oxytoca        | 2                    | 347                       | 99.9               | 94                       | 179     | 1    | 36  | 2   | 1    | 66      | 2    | 2   |
| 33  | NICU-1_S10_Klebs          | Norway Outbreak (30)      | Control Strain       | Rønning et al. (30) | provided as fastq | blaOXY_1-2  | K. michiganensis  | K. michiganensis  | 5                    | 1708                      | 99.8               | 77                       | missing | 3    | 41  | 8   | 29   | missing | 6    | 45  |
| 34  | NICU-2_Klebs              | Norway Outbreak (30)      | Control Strain       | Rønning et al. (30) | provided as fastq | blaOXY_2-4  | K. oxytoca        | K. oxytoca        | 38                   | 350                       | 98.5               | 68                       | 178     | 1    | 11  | 2   | 1    | 4       | 1    | 2   |
| 35  | NICU-3_Klebs              | Norway Outbreak (30)      | Control Strain       | Rønning et al. (30) | provided as fastq | blaOXY_6-4  | K. grimontii      | K. grimontii      | 10                   | 1924                      | 99.6               | 141                      | 215     | 21   | 6   | 14  | 10   | 46      | 11   | 6   |
| 36  | NICU-4_Klebs              | Norway Outbreak (30)      | Control Strain       | Rønning et al. (30) | provided as fastq | blaOXY_6-5  | K. grimontii      | K. oxytoca        | 4                    | 1931                      | 99.8               | 93                       | 467     | 5    | 6   | 83  | 75   | 46      | 8    | 103 |
| 37  | NICU-5_Klebs              | Norway Outbreak (30)      | Control Strain       | Rønning et al. (30) | provided as fastq | blaOXY_6-1  | K. grimontii      | K. oxytoca        | 5                    | 1971                      | 99.8               | 164                      | 168     | 15   | 6   | 39  | 10   | 46      | 24   | 6   |
| 38  | E1a_S4_Klebs              | Norway Outbreak (30)      | Control Strain       | Rønning et al. (30) | provided as fastq | blaOXY_1-1  | K. michiganensis  | K. oxytoca        | 142                  | 1817                      | 94.4               | 20                       | 202     | 3    | 5   | 21  | 13   | 74      | 6    | 12  |
| 39  | E1b_S18_Klebs             | Norway Outbreak (30)      | Control Strain       | Rønning et al. (30) | provided as fastq | blaOXY_1-1  | K. michiganensis  | K. oxytoca        | 6                    | 1728                      | 99.8               | 56                       | 202     | 3    | 5   | 21  | 13   | 74      | 6    | 12  |
| 40  | NZ_AP014951               | Norway Outbreak Reference | Reference            | SAMD00039250        | download NCBI     | blaOXY_6-2  | K. grimontii      | na                | 9                    | 1962                      | 99.6               | na                       | 263     | 6    | 6   | 26  | 10   | 46      | 24   | 33  |
| 41  | O1-S10-66_Patient2        | Graz Outbreak 2010 (4)    | Outbreak Strain      | SAMN39061537        | newly sequenced   | blaOXY_2-2  | K. oxytoca        | K. oxytoca        | 5                    | 377                       | 99.8               | 131                      | 199     | 2    | 2   | 2   | 3    | 19      | 2    | 2   |
| 42  | O1-S10-67_Patient1        | Graz Outbreak 2010 (4)    | Outbreak Strain      | SAMN39061538        | newly sequenced   | blaOXY_2-2  | K. oxytoca        | K. oxytoca        | 5                    | 376                       | 99.8               | 130                      | 199     | 2    | 2   | 2   | 3    | 19      | 2    | 2   |
| 43  | O1-S10-68_Patient3        | Graz Outbreak 2010 (4)    | Outbreak Strain      | SAMN39061539        | newly sequenced   | blaOXY_2-2  | K. oxytoca        | K. oxytoca        | 6                    | 377                       | 99.8               | 148                      | 199     | 2    | 2   | 2   | 3    | 19      | 2    | 2   |
| 44  | O1-S10-74_Patient4        | Graz Outbreak 2010 (4)    | Outbreak Strain      | SAMN39061540        | newly sequenced   | blaOXY_2-2  | K. oxytoca        | K. oxytoca        | 5                    | 380                       | 99.8               | 154                      | 199     | 2    | 2   | 2   | 3    | 19      | 2    | 2   |
| 45  | O1-S11-17_Patient5        | Graz Outbreak 2010 (4)    | Outbreak Strain      | SAMN39061541        | newly sequenced   | blaOXY_2-2  | K. oxytoca        | K. oxytoca        | 5                    | 380                       | 99.8               | 157                      | 199     | 2    | 2   | 2   | 3    | 19      | 2    | 2   |
| 46  | O1-S3_Control1            | Graz Outbreak 2010 (4)    | Control Strain       | SAMN39061542        | newly sequenced   | blaOXY_2-2  | K. oxytoca        | K. oxytoca        | 3                    | 386                       | 99.9               | 177                      | 199     | 2    | 2   | 2   | 3    | 19      | 2    | 2   |
| 47  | O1-S11-55_Control2        | Graz Outbreak 2010 (4)    | Control Strain       | SAMN39061543        | newly sequenced   | blaOXY_2-7  | K. oxytoca        | K. oxytoca        | 2                    | 359                       | 99.9               | 121                      | 199     | 2    | 2   | 2   | 3    | 19      | 2    | 2   |
| 48  | O2_Patient10_K10          | Graz Outbreak 2013 (7)    | Outbreak Strain      | SAMN39061544        | newly sequenced   | blaOXY_2-2  | K. oxytoca        | K. oxytoca        | 5                    | 385                       | 99.8               | 154                      | 199     | 2    | 2   | 2   | 3    | 19      | 2    | 2   |
| 49  | O2_Patient11_K11          | Graz Outbreak 2013 (7)    | Outbreak Strain      | SAMN39061545        | newly sequenced   | blaOXY_2-2  | K. oxytoca        | K. oxytoca        | 5                    | 381                       | 99.8               | 154                      | 199     | 2    | 2   | 2   | 3    | 19      | 2    | 2   |
| 50  | O2_Patient12_K12          | Graz Outbreak 2013 (7)    | Outbreak Strain      | SAMN39061546        | newly sequenced   | blaOXY_2-2  | K. oxytoca        | K. oxytoca        | 13                   | 384                       | 99.5               | 58                       | 199     | 2    | 2   | 2   | 3    | 19      | 2    | 2   |
| 51  | O2_Patient1_K1            | Graz Outbreak 2013 (7)    | Outbreak Strain      | SAMN39061547        | newly sequenced   | blaOXY_2-2  | K. oxytoca        | K. oxytoca        | 5                    | 378                       | 99.8               | 161                      | 199     | 2    | 2   | 2   | 3    | 19      | 2    | 2   |
| 52  | O2_Patient3_K3            | Graz Outbreak 2013 (7)    | Outbreak Strain      | SAMN39061548        | newly sequenced   | blaOXY_2-2  | K. oxytoca        | K. oxytoca        | 9                    | 376                       | 99.6               | 158                      | 199     | 2    | 2   | 2   | 3    | 19      | 2    | 2   |
| 53  | O2_Patient5_K5            | Graz Outbreak 2013 (7)    | Outbreak Strain      | SAMN39061549        | newly sequenced   | blaOXY_2-2  | K. oxytoca        | K. oxytoca        | 6                    | 377                       | 99.8               | 157                      | 199     | 2    | 2   | 2   | 3    | 19      | 2    | 2   |
| 54  | O2_Patient9_K9            | Graz Outbreak 2013 (7)    | Outbreak Strain      | SAMN39061550        | newly sequenced   | blaOXY_2-2  | K. oxytoca        | K. oxytoca        | 5                    | 377                       | 99.8               | 145                      | 199     | 2    | 2   | 2   | 3    | 19      | 2    | 2   |
| 55  | O2_Sinks19_Koxy13         | Graz Outbreak 2013 (7)    | Outbreak Strain      | SAMN39061551        | newly sequenced   | blaOXY_2-2  | K. oxytoca        | K. oxytoca        | 8                    | 382                       | 99.7               | 150                      | 199     | 2    | 2   | 2   | 3    | 19      | 2    | 2   |
| 56  | O2_Sinks27_Koxy14         | Graz Outbreak 2013 (7)    | Outbreak Strain      | SAMN39061552        | newly sequenced   | blaOXY_2-2  | K. oxytoca        | K. oxytoca        | 6                    | 378                       | 99.8               | 148                      | 199     | 2    | 2   | 2   | 3    | 19      | 2    | 2   |
| 57  | O2_Sinks39_Koxy16         | Graz Outbreak 2013 (7)    | Outbreak Strain      | SAMN39061553        | newly sequenced   | blaOXY_2-2  | K. oxytoca        | K. oxytoca        | 7                    | 378                       | 99.7               | 90                       | 199     | 2    | 2   | 2   | 3    | 19      | 2    | 2   |
| 58  | O2_Sinks53_Koxy17         | Graz Outbreak 2013 (7)    | Outbreak Strain      | SAMN39061554        | newly sequenced   | blaOXY_2-2  | K. oxytoca        | K. oxytoca        | 5                    | 384                       | 99.8               | 159                      | 199     | 2    | 2   | 2   | 3    | 19      | 2    | 2   |
| 59  | O2_Control217             | Graz Outbreak 2013 (7)    | Control Strain       | SAMN39061555        | newly sequenced   | blaOXY_2-7  | K. oxytoca        | K. oxytoca        | 2                    | 341                       | 99.9               | 180                      | 199     | 2    | 2   | 2   | 3    | 19      | 2    | 2   |
| 60  | O2_Control353             | Graz Outbreak 2013 (7)    | Control Strain       | SAMN39061556        | newly sequenced   | blaOXY_2-2  | K. oxytoca        | K. oxytoca        | 8                    | 380                       | 99.7               | 158                      | 199     | 2    | 2   | 2   | 3    | 19      | 2    | 2   |
| 61  | O2_Control402             | Graz Outbreak 2013 (7)    | Control Strain       | SAMN39061557        | newly sequenced   | blaOXY_2-2  | K. oxytoca        | K. oxytoca        | 5                    | 381                       | 99.8               | 162                      | 199     | 2    | 2   | 2   | 3    | 19      | 2    | 2   |
| 62  | Sb-24                     | NCBI                      | -                    | SAMN18746951        | download NCBI     | blaOXY_4-3  | K. pasteurii      | na                | 17                   | 2042                      | 99.3               | 133                      | 322     | 17   | 23  | 38  | 39   | 26      | 25   | 22  |
| 63  | SS141_NZ_CP044527_N2_CP04 | NCBI                      | -                    | SAMN10462700        | download NCBI     | blaOXY_6-4  | K. grimontii      | na                | 6                    | 1933                      | 99.8               | 136                      | missing | 21   | 6   | 14  | 10   | missing | 11   | 6   |
| 64  | Kox205                    | NCBI                      | -                    | SAMN23286136        | download NCBI     | blaOXY_4-1  | K. pasteurii      | na                | 3                    | 2041                      | 99.9               | 42                       | 300     | 13   | 23  | 38  | 39   | 69      | 25   | 22  |
| 65  | RHBSTW.00054_CP055412_CP1 | NCBI                      | -                    | SAMN15148463        | download NCBI     | blaOXY_6-4  | K. grimontii      | na                | 31                   | 1930                      | 99.8               | 94                       | 215     | 21   | 6   | 14  | 10   | 46      | 11   | 6   |
