# Supplementary material for: Core genome multilocus sequence typing (cgMLST) applicable to the monophyletic Klebsiella oxytoca species complex
Source: PubMed Central journal article supplement (PMC11237601; doi:10.1128/jcm.01725-23), 2024-05-23
Supplement: jcm.01725-23-s0003.pdf [file jcm.01725-23-s0003.pdf]

Supplementary Table 3: Table containing all examined isolates included in our study and the associated results of resistance. 16 antibiotics of the AMR search in SeqSphere+ only are listed as resistance genes were found in at least one of our isolates. Also, the number of found plasmids is noted.

| No. | Sample ID                 | Association (ref)         | Gentamicin      | Kanamycin | Streptomycin        | Beta-lactam  | Carbapenem                       | Cephalosporin | Erythromycin | Teithromycin | Tylosin       | Chloramphenicol | Florfenicol        | Phenicol                           | Quinolone   | Sulfonamide | Tetracycline | Trimethoprim | Plasmids Found |
|-----|---------------------------|---------------------------|-----------------|-----------|---------------------|--------------|----------------------------------|---------------|--------------|--------------|---------------|-----------------|--------------------|------------------------------------|-------------|-------------|--------------|--------------|----------------|
| 1   | #306_neg                  | Graz strain collection    |                 |           |                     |              | blaOXY-1-1 (ESBL)                |               |              |              |               |                 | oqxA / oqxB        | oqxA / oqxB                        |             |             |              |              | 2              |
| 2   | #75_neg                   | Graz strain collection    |                 |           |                     |              | aph(3')-Ia                       |               |              |              |               |                 | oqxA / oqxB        | oqxA / oqxB                        |             |             |              |              | 0              |
| 3   | 15_neg                    | Graz strain collection    |                 |           |                     |              |                                  |               |              |              |               |                 | blaOXY-5-2 (ESBL)  |                                    |             |             |              |              | 3              |
| 4   | 25_pos                    | Graz strain collection    |                 |           |                     |              |                                  |               |              |              |               |                 | blaOXY-6-1 (ESBL)  |                                    |             |             |              |              | 9              |
| 5   | #119_pos                  | Graz strain collection    |                 |           |                     |              | aph(3')-Ia                       |               |              |              |               |                 | blaOXY (ESBL)      | oqxA / oqxB                        | oqxA / oqxB |             |              |              | 7              |
| 6   | #21_neg                   | Graz strain collection    |                 |           |                     |              |                                  |               |              |              |               |                 | blaOXY-1-9 (ESBL)  | oqxB                               | oqxB        |             |              |              | 2              |
| 7   | #19_neg                   | Graz strain collection    |                 |           |                     |              |                                  |               |              |              |               |                 | blaOXY-2-21 (ESBL) | oqxA / oqxB                        | oqxA / oqxB |             |              |              | 3              |
| 8   | #311_pos                  | Graz strain collection    |                 |           |                     |              |                                  |               |              |              |               |                 | blaOXY-6-2 (ESBL)  | oqxA / oqxB                        | oqxA / oqxB |             |              |              | 2              |
| 9   | #335_pos                  | Graz strain collection    |                 |           |                     |              |                                  |               |              |              |               |                 | blaOXY-4-1 (ESBL)  | oqxA / oqxB                        | oqxA / oqxB |             |              |              | 1              |
| 10  | 21_neg                    | Graz strain collection    |                 |           |                     |              |                                  |               |              |              |               |                 | blaOXY-5-5 (ESBL)  | oqxA / oqxB                        | oqxA / oqxB |             |              |              | 0              |
| 11  | #118_pos                  | Graz strain collection    |                 |           |                     |              |                                  |               |              |              |               |                 | blaOXY-2-1 (ESBL)  | oqxA / oqxB                        | oqxA / oqxB |             |              |              | 0              |
| 12  | #218_neg                  | Graz strain collection    |                 |           |                     |              |                                  |               |              |              |               |                 | blaOXY-2-21 (ESBL) | oqxA / oqxB                        | oqxA / oqxB |             |              |              | 3              |
| 13  | S10_Klebs                 | Norway Outbreak (30)      |                 |           |                     |              |                                  |               |              |              |               |                 | blaOXY-2-2 (ESBL)  | oqxA / oqxB                        | oqxA / oqxB |             |              |              | 0              |
| 14  | S11_Klebs                 | Norway Outbreak (30)      |                 |           |                     |              |                                  |               |              |              |               |                 | blaOXY-2-2 (ESBL)  | oqxA / oqxB                        | oqxA / oqxB |             |              |              | 0              |
| 15  | S12_Klebs                 | Norway Outbreak (30)      |                 |           |                     |              |                                  |               |              |              |               |                 | blaOXY-2-2 (ESBL)  | oqxA / oqxB                        | oqxA / oqxB |             |              |              | 5              |
| 16  | S13_Klebs                 | Norway Outbreak (30)      |                 |           |                     |              |                                  |               |              |              |               |                 | blaOXY-2-2 (ESBL)  | oqxA / oqxB                        | oqxA / oqxB |             |              |              | 0              |
| 17  | S14_Klebs                 | Norway Outbreak (30)      |                 |           |                     |              |                                  |               |              |              |               |                 | blaOXY-2-2 (ESBL)  | oqxA / oqxB                        | oqxA / oqxB |             |              |              | 0              |
| 18  | S15_Klebs                 | Norway Outbreak (30)      |                 |           |                     |              |                                  |               |              |              |               |                 | blaOXY-2-2 (ESBL)  | oqxA / oqxB                        | oqxA / oqxB |             |              |              | 0              |
| 19  | S16_Klebs                 | Norway Outbreak (30)      |                 |           |                     |              |                                  |               |              |              |               |                 | blaOXY-2-2 (ESBL)  | oqxA / oqxB                        | oqxA / oqxB |             |              |              | 0              |
| 20  | S17_Klebs                 | Norway Outbreak (30)      |                 |           |                     |              |                                  |               |              |              |               |                 | blaOXY-2-2 (ESBL)  | oqxA / oqxB                        | oqxA / oqxB |             |              |              | 0              |
| 21  | S18_Klebs                 | Norway Outbreak (30)      |                 |           |                     |              |                                  |               |              |              |               |                 | blaOXY-2-2 (ESBL)  | oqxA / oqxB                        | oqxA / oqxB |             |              |              | 0              |
| 22  | S19_Klebs                 | Norway Outbreak (30)      |                 |           |                     |              |                                  |               |              |              |               |                 | blaOXY-2-2 (ESBL)  | oqxA / oqxB                        | oqxA / oqxB |             |              |              | 0              |
| 23  | S1_S12_Klebs              | Norway Outbreak (30)      |                 |           |                     |              |                                  |               |              |              |               |                 | blaOXY-2-2 (ESBL)  | oqxB                               | oqxB        |             |              |              | 0              |
| 24  | S2_S11_Klebs              | Norway Outbreak (30)      |                 |           |                     |              |                                  |               |              |              |               |                 | blaOXY-2-2 (ESBL)  | oqxA / oqxB                        | oqxA / oqxB |             |              |              | 0              |
| 25  | S6_Klebs                  | Norway Outbreak (30)      |                 |           |                     |              |                                  |               |              |              |               |                 | blaOXY-2-2 (ESBL)  | oqxA / oqxB                        | oqxA / oqxB |             |              |              | 0              |
| 26  | S7_Klebs                  | Norway Outbreak (30)      |                 |           |                     |              |                                  |               |              |              |               |                 | blaOXY-2-2 (ESBL)  | oqxA / oqxB                        | oqxA / oqxB |             |              |              | 0              |
| 27  | S8_Klebs                  | Norway Outbreak (30)      |                 |           |                     |              |                                  |               |              |              |               |                 | blaOXY-2-2 (ESBL)  | oqxA / oqxB                        | oqxA / oqxB |             |              |              | 0              |
| 28  | S9_Klebs                  | Norway Outbreak (30)      |                 |           |                     |              |                                  |               |              |              |               |                 | blaOXY-2-2 (ESBL)  | oqxA / oqxB                        | oqxA / oqxB |             |              |              | 0              |
| 29  | I4a_S7_Klebs              | Norway Outbreak (30)      |                 |           |                     |              |                                  |               |              |              |               |                 | blaOXY-2-2 (ESBL)  | oqxA / oqxB                        | oqxA / oqxB |             |              |              | 0              |
| 30  | I4b_S8_Klebs              | Norway Outbreak (30)      |                 |           |                     |              |                                  |               |              |              |               |                 | blaOXY-2-2 (ESBL)  | oqxA / oqxB                        | oqxA / oqxB |             |              |              | 0              |
| 31  | I4c_S9_Klebs              | Norway Outbreak (30)      |                 |           |                     |              |                                  |               |              |              |               |                 | blaOXY-2-2 (ESBL)  | oqxA / oqxB                        | oqxA / oqxB |             |              |              | 0              |
| 32  | I7_Klebs                  | Norway Outbreak (30)      |                 |           |                     |              |                                  |               |              |              |               |                 | blaOXY-2-2 (ESBL)  | oqxA / oqxB                        | oqxA / oqxB |             |              |              | 0              |
| 33  | NICU-1_S10_Klebs          | Norway Outbreak (30)      |                 |           |                     |              |                                  |               |              |              |               |                 | blaOXY-1-2 (ESBL)  | oqxA / oqxB                        | oqxA / oqxB |             |              |              | 7              |
| 34  | NICU-2_Klebs              | Norway Outbreak (30)      |                 |           |                     |              |                                  |               |              |              |               |                 | blaOXY-2-4 (ESBL)  | oqxA / oqxB                        | oqxA / oqxB |             |              |              | 4              |
| 35  | NICU-3_Klebs              | Norway Outbreak (30)      |                 |           |                     |              |                                  |               |              |              |               |                 | blaOXY-6-4 (ESBL)  | oqxA / oqxB                        | oqxA / oqxB |             |              |              | 3              |
| 36  | NICU-4_Klebs              | Norway Outbreak (30)      |                 |           |                     |              |                                  |               |              |              |               |                 | blaOXY-6-5 (ESBL)  | oqxA / oqxB                        | oqxA / oqxB |             |              |              | 0              |
| 37  | NICU-5_Klebs              | Norway Outbreak (30)      |                 |           |                     |              |                                  |               |              |              |               |                 | blaOXY-6-1 (ESBL)  | oqxA / oqxB                        | oqxA / oqxB |             |              |              | 2              |
| 38  | E1a_S4_Klebs              | Norway Outbreak (30)      |                 |           |                     |              | aph(3')-Ia                       |               |              |              |               |                 | blaOXY-1-1 (ESBL)  | oqxA / oqxB                        | oqxA / oqxB |             |              |              | 1              |
| 39  | E1b_S18_Klebs             | Norway Outbreak (30)      |                 |           |                     |              | aph(3')-Ia                       |               |              |              |               |                 | blaOXY-1-1 (ESBL)  | oqxA / oqxB                        | oqxA / oqxB |             |              |              | 1              |
| 40  | NZ_AP014951_plasmids      | Norway Outbreak Reference |                 |           |                     |              |                                  |               |              |              |               |                 | blaOXY-6-2 (ESBL)  | oqxA / oqxB                        | oqxA / oqxB |             |              |              | 4              |
| 41  | O1-S10-66_Patient2        | Graz Outbreak 2010 (4)    | aac(6')-Ib'     | aadA1     | blaOXA / blaTEM-1   | blaKPC-2 (ci | blaOXY-2-2 (ESBL)                |               |              |              | floR          | floR            | oqxA / oqxB        | oqxA / oqxB                        | oqxA / oqxB | sul1 / sul2 | tet(E)       | dfrrB1       | 5              |
| 42  | O1-S10-67_Patient1        | Graz Outbreak 2010 (4)    | aac(6')-Ib'     | aadA1     | blaOXA / blaTEM-1   | blaKPC-2 (ci | blaOXY-2-2 (ESBL)                |               |              |              | floR          | floR            | oqxA / oqxB        | oqxA / oqxB                        | oqxA / oqxB | sul1 / sul2 | tet(E)       | dfrrB1       | 5              |
| 43  | O1-S10-68_Patient3        | Graz Outbreak 2010 (4)    | aac(6')-Ib'     | aadA1     | blaOXA / blaTEM-1   | blaKPC-2 (ci | blaOXY-2-2 (ESBL)                |               |              |              | floR          | floR            | oqxA / oqxB        | oqxA / oqxB                        | oqxA / oqxB | sul1 / sul2 | tet(E)       | dfrrB1       | 5              |
| 44  | O1-S10-74_Patient4        | Graz Outbreak 2010 (4)    | aac(6')-Ib'     | aadA1     | blaOXA / blaTEM-1   | blaKPC-2 (ci | blaOXY-2-2 (ESBL)                |               |              |              | floR          | floR            | oqxA / oqxB        | oqxA / oqxB                        | oqxA / oqxB | sul1 / sul2 | tet(E)       | dfrrB1       | 5              |
| 45  | O1-S11-17_Patient5        | Graz Outbreak 2010 (4)    | aac(6')-Ib'     | aadA1     | blaOXA / blaTEM-1   | blaKPC-2 (ci | blaOXY-2-2 (ESBL)                |               |              |              | floR          | floR            | oqxA / oqxB        | oqxA / oqxB                        | oqxA / oqxB | sul1 / sul2 | tet(E)       | dfrrB1       | 4              |
| 46  | O1-33_Control1            | Graz Outbreak 2010 (4)    |                 |           |                     |              | blaOXY-2-2 (ESBL)                |               |              |              |               |                 | oqxA / oqxB        | oqxA / oqxB                        |             |             |              |              | 0              |
| 47  | O1-S11-55_Control2        | Graz Outbreak 2010 (4)    |                 |           |                     |              | blaOXY-2-7 (ESBL)                |               |              |              |               |                 | oqxA / oqxB        | oqxA / oqxB                        |             |             |              |              | 1              |
| 48  | O2_Patient10_K10          | Graz Outbreak 2013 (7)    | aac(6')-Ib'     |           | blaOXA / blaTEM-1   | blaKPC-2 (ci | blaOXY-2-2 (ESBL)                |               |              |              | floR          | floR            | oqxA / oqxB        | oqxA / oqxB                        | oqxA / oqxB | sul1 / sul2 | tet(E)       |              | 4              |
| 49  | O2_Patient11_K11          | Graz Outbreak 2013 (7)    | aac(6')-Ib'     | aadA1     | blaOXA / blaTEM-1   | blaKPC-2 (ci | blaOXY-2-2 (ESBL)                |               |              |              | floR          | floR            | oqxA / oqxB        | oqxA / oqxB                        | oqxA / oqxB | sul1 / sul2 | tet(E)       | dfrrB1       | 6              |
| 50  | O2_Patient12_K12          | Graz Outbreak 2013 (7)    | aac(6')-Ib'     | aadA1     | blaOXA / blaTEM-1   | blaKPC-2 (ci | blaOXY-2-2 (ESBL)                |               |              |              | floR          | floR            | oqxA / oqxB        | oqxA / oqxB                        | oqxA / oqxB | sul1 / sul2 | tet(E)       |              | 5              |
| 51  | O2_Patient1_K1            | Graz Outbreak 2013 (7)    | aac(6')-Ib'     |           | blaOXA / blaTEM-1   | blaKPC-2 (ci | blaOXY-2-2 (ESBL)                |               |              |              | floR          | floR            | oqxA / oqxB        | oqxA / oqxB                        | oqxA / oqxB | sul1 / sul2 | tet(E)       |              | 3              |
| 52  | O2_Patient3_K3            | Graz Outbreak 2013 (7)    | aac(6')-Ib'     |           | blaOXA / blaTEM-1   | blaKPC-2 (ci | blaOXY-2-2 (ESBL)                |               |              |              | floR          | floR            | oqxA / oqxB        | oqxA / oqxB                        | oqxA / oqxB | sul1 / sul2 | tet(E)       |              | 4              |
| 53  | O2_Patient5_K5            | Graz Outbreak 2013 (7)    | aac(6')-Ib'     |           | blaOXA / blaTEM-1   | blaKPC-2 (ci | blaOXY-2-2 (ESBL)                |               |              |              | floR          | floR            | oqxA / oqxB        | oqxA / oqxB                        | oqxA / oqxB | sul1 / sul2 | tet(E)       |              | 5              |
| 54  | O2_Patient9_K9            | Graz Outbreak 2013 (7)    | aac(6')-Ib'     |           | blaOXA / blaTEM-1   | blaKPC-2 (ci | blaOXY-2-2 (ESBL)                |               |              |              | floR          | floR            | oqxA / oqxB        | oqxA / oqxB                        | oqxA / oqxB | sul1 / sul2 | tet(E)       |              | 3              |
| 55  | O2_Sinks19_Koxy13         | Graz Outbreak 2013 (7)    | aac(6')-Ib'     | aadA1     | blaOXA / blaTEM-1   | blaKPC-2 (ci | blaOXY-2-2 (ESBL)                |               |              |              | floR          | floR            | oqxA / oqxB        | oqxA / oqxB                        | oqxA / oqxB | sul1 / sul2 | tet(E)       |              | 4              |
| 56  | O2_Sinks27_Koxy14         | Graz Outbreak 2013 (7)    | aac(6')-Ib'     |           | blaOXA / blaTEM-1   | blaKPC-2 (ci | blaOXY-2-2 (ESBL)                |               |              |              | floR          | floR            | oqxA / oqxB        | oqxA / oqxB                        | oqxA / oqxB | sul1 / sul2 | tet(E)       |              | 5              |
| 57  | O2_Sinks39_Koxy16         | Graz Outbreak 2013 (7)    | aac(6')-Ib'     | aadA1     | blaOXA / blaTEM-1   | blaKPC-2 (ci | blaOXY-2-2 (ESBL)                |               |              |              | floR          | floR            | oqxA / oqxB        | oqxA / oqxB                        | oqxA / oqxB | sul1 / sul2 | tet(E)       |              | 4              |
| 58  | O2_Sinks53_Koxy17         | Graz Outbreak 2013 (7)    | aac(6')-Ib'     | aadA1     | blaOXA / blaTEM-1   | blaKPC-2 (ci | blaOXY-2-2 (ESBL)                |               |              |              | floR          | floR            | oqxA / oqxB        | oqxA / oqxB                        | oqxA / oqxB | sul1 / sul2 | tet(E)       |              | 3              |
| 59  | O2_Control217             | Graz Outbreak 2013 (7)    |                 |           |                     |              | blaOXY-2-7 (ESBL)                |               |              |              |               |                 | oqxA / oqxB        | oqxA / oqxB                        |             |             |              |              | 0              |
| 60  | O2_Control353             | Graz Outbreak 2013 (7)    |                 |           |                     |              | blaOXY-2-2 (ESBL)                |               |              |              |               |                 | oqxA / oqxB        | oqxA / oqxB                        |             |             |              |              | 0              |
| 61  | O2_Control402             | Graz Outbreak 2013 (7)    | aac(6')-Ib'     | aadA1     |                     |              | blaOXY-2-2 (ESBL)                |               |              |              | floR          | floR            | oqxA / oqxB        | oqxA / oqxB                        | oqxA / oqxB | sul1 / sul2 | tet(E)       | dfrrB1       | 4              |
| 62  | Sb-24                     | NCBI Download             |                 |           |                     |              | blaOXY-4-3 (ESBL)                |               |              |              |               |                 | oqxA               | oqxA                               |             |             |              |              | 1              |
| 63  | SS141 NZ_CP044527 NZ_CP04 | NCBI Download             |                 |           |                     |              | blaOXY-6-4 (ESBL)                |               |              |              |               |                 | oqxA / oqxB        | oqxA / oqxB                        |             |             |              |              | 3              |
| 64  | Kox205                    | NCBI Download             | aac(3)-IId / aa |           | aph(3')-Ib blaTEM-1 | blaIMP-4     | blaOXY-4-1 (ESBL) / blaS1 mph(A) | mph(A)        | mph(A)       |              | catA2 / catB3 |                 | oqxA / oqxB        | oqxA / oqxB / qr sul1, sul1 / sul2 |             |             |              |              | 3              |
| 65  | RHBSTW-00054 CP055412 CP0 | NCBI Download             |                 |           |                     |              | blaOXY-6-4 (ESBL)                |               |              |              |               |                 | oqxA / oqxB        | oqxA / oqxB                        |             |             |              |              | 5              |
