# Supplementary material for: Core genome multilocus sequence typing (cgMLST) applicable to the monophyletic Klebsiella oxytoca species complex
Source: PubMed Central journal article supplement (PMC11237601; doi:10.1128/jcm.01725-23), 2024-05-23
Supplement: jcm.01725-23-s0004.pdf [file jcm.01725-23-s0004.pdf]

Supplementary Table 4: A list of all examined isolates included in our study with results of the toxigenic *tlf* cluster. Included are the respective Sample ID used also in figures, the species assignment from the blaOXY gene and the association. The number of missing alleles of the tilvalline cluster gives the number of missing numbers for the 12 genes in the following columns and was used to assign "yes", "no" or "yes (xxx missing)" in the column od toxicity based on genetic results. The cutoff for confirmed toxicity was more than 3 missing alleles.

| No. | Species blaOXY                  | Sample ID                | Association                       | ST      | toxicity based on genetic results | Number of missing alleles of tilvalline cluster | Number of missing alleles of tilvalline cluster |             |             |             |             |             |             |             |             |             |             |             |
|-----|---------------------------------|--------------------------|-----------------------------------|---------|-----------------------------------|-------------------------------------------------|-------------------------------------------------|-------------|-------------|-------------|-------------|-------------|-------------|-------------|-------------|-------------|-------------|-------------|
|     |                                 |                          |                                   |         |                                   |                                                 | NDX50_24820                                     | NDX50_24830 | NDX50_24835 | NDX50_24840 | NDX50_24845 | NDX50_24850 | NDX50_24855 | NDX50_24865 | NDX50_24870 | NDX50_24810 | NDX50_24815 | NDX50_24825 |
| 0   | <i>Klebsiella oxytoca</i>       | Reference - AHC-6        | Reference <i>tlf</i> gene cluster |         | yes                               | 0                                               | 7                                               | 7           | 8           | 6           | 7           | 8           | 1           | 11          | 11          | 6           | 6           | 4           |
| 1   | <i>Klebsiella michiganensis</i> | #306_neg                 | Graz strain collection            | 27      | no                                | 12                                              | (not found)                                     | (not found) | (not found) | (not found) | (not found) | (not found) | (not found) | (not found) | (not found) | (not found) | (not found) | (not found) |
| 2   | <i>Klebsiella michiganensis</i> | #75_neg                  | Graz strain collection            | 11      | no                                | 12                                              | (not found)                                     | (not found) | (not found) | (not found) | (not found) | (not found) | (not found) | (not found) | (not found) | (not found) | (not found) | (not found) |
| 3   | <i>Klebsiella michiganensis</i> | #15_neg                  | Graz strain collection            | 82      | no                                | 12                                              | (not found)                                     | (not found) | (not found) | (not found) | (not found) | (not found) | (not found) | (not found) | (not found) | (not found) | (not found) | (not found) |
| 4   | <i>Klebsiella grimmontii</i>    | 25_pos                   | Graz strain collection            | 377     | yes (hmoX missing)                | 1                                               | 11                                              | 11          | 12          | 8           | 10          | 12          | 13          | 15          | 13          | 9           | 9           | 1           |
| 5   | <i>Klebsiella michiganensis</i> | #119_pos                 | Graz strain collection            | 35      | yes (Small gene + hmoX missing)   | 2                                               | 4                                               | 3           | 4           | 4           | 4           | 4           | 6           | 7           | 4           | 4           | 3           | 3           |
| 6   | <i>Klebsiella michiganensis</i> | #21_neg                  | Graz strain collection            | 40      | no                                | 12                                              | (not found)                                     | (not found) | (not found) | (not found) | (not found) | (not found) | (not found) | (not found) | (not found) | (not found) | (not found) | (not found) |
| 7   | <i>Klebsiella oxytoca</i>       | #19_neg                  | Graz strain collection            | 78      | no                                | 8                                               | (not found)                                     | (not found) | (not found) | (not found) | (not found) | (not found) | (not found) | (not found) | (not found) | (not found) | (not found) | (not found) |
| 8   | <i>Klebsiella grimmontii</i>    | #311_pos                 | Graz strain collection            | 216     | yes (hmoX missing)                | 1                                               | 1                                               | 1           | 1           | 1           | 1           | 1           | 3           | 3           | 3           | 3           | 3           | 1           |
| 9   | <i>Klebsiella pasteurii</i>     | #335_pos                 | Graz strain collection            | 7       | yes (Small gene + hmoX missing)   | 2                                               | 12                                              | 12          | 13          | 9           | 11          | 13          | 16          | 14          | 9           | 9           | (not found) | 5           |
| 10  | <i>Klebsiella michiganensis</i> | #21_neg                  | Graz strain collection            | 80      | no                                | 12                                              | (not found)                                     | (not found) | (not found) | (not found) | (not found) | (not found) | (not found) | (not found) | (not found) | (not found) | (not found) | (not found) |
| 11  | <i>Klebsiella oxytoca</i>       | #118_pos                 | Graz strain collection            | 19      | yes                               | 0                                               | 2                                               | 2           | 2           | 2           | 2           | 2           | 3           | 4           | 2           | 1           | 1           | 2           |
| 12  | <i>Klebsiella oxytoca</i>       | #218_neg                 | Graz strain collection            | 58      | no                                | 8                                               | (not found)                                     | (not found) | (not found) | (not found) | (not found) | (not found) | (not found) | 2           | 4           | 2           | 4           | (not found) |
| 13  | <i>Klebsiella oxytoca</i>       | S10_Klebs                | Norway Outbreak (30)              | 179     | yes                               | 0                                               | 3                                               | 2           | 3           | 3           | 3           | 3           | 2           | 5           | 6           | 1           | 1           | 2           |
| 14  | <i>Klebsiella oxytoca</i>       | S11_Klebs                | Norway Outbreak (30)              | 179     | yes                               | 0                                               | 3                                               | 2           | 3           | 3           | 3           | 3           | 2           | 5           | 6           | 1           | 1           | 2           |
| 15  | <i>Klebsiella oxytoca</i>       | S12_Klebs                | Norway Outbreak (30)              | 179     | yes                               | 0                                               | 3                                               | 2           | 3           | 3           | 3           | 3           | 2           | 5           | 6           | 1           | 1           | 2           |
| 16  | <i>Klebsiella oxytoca</i>       | S13_Klebs                | Norway Outbreak (30)              | 179     | yes                               | 0                                               | 3                                               | 2           | 3           | 3           | 3           | 3           | 2           | 5           | 6           | 1           | 1           | 2           |
| 17  | <i>Klebsiella oxytoca</i>       | S14_Klebs                | Norway Outbreak (30)              | 179     | yes                               | 0                                               | 3                                               | 2           | 3           | 3           | 3           | 3           | 2           | 5           | 6           | 1           | 1           | 2           |
| 18  | <i>Klebsiella oxytoca</i>       | S15_Klebs                | Norway Outbreak (30)              | 179     | yes                               | 0                                               | 3                                               | 2           | 3           | 3           | 3           | 3           | 2           | 5           | 6           | 1           | 1           | 2           |
| 19  | <i>Klebsiella oxytoca</i>       | S16_Klebs                | Norway Outbreak (30)              | 179     | yes                               | 0                                               | 3                                               | 2           | 3           | 3           | 3           | 3           | 2           | 5           | 6           | 1           | 1           | 2           |
| 20  | <i>Klebsiella oxytoca</i>       | S17_Klebs                | Norway Outbreak (30)              | 179     | yes                               | 0                                               | 3                                               | 2           | 3           | 3           | 3           | 3           | 2           | 5           | 6           | 1           | 1           | 2           |
| 21  | <i>Klebsiella oxytoca</i>       | S18_Klebs                | Norway Outbreak (30)              | 179     | yes                               | 0                                               | 3                                               | 2           | 3           | 3           | 3           | 3           | 2           | 5           | 6           | 1           | 1           | 2           |
| 22  | <i>Klebsiella oxytoca</i>       | S19_Klebs                | Norway Outbreak (30)              | 179     | yes                               | 0                                               | 3                                               | 2           | 3           | 3           | 3           | 3           | 2           | 5           | 6           | 1           | 1           | 2           |
| 23  | <i>Klebsiella oxytoca</i>       | S1_S12_Klebs             | Norway Outbreak (30)              | 179     | yes                               | 0                                               | 3                                               | 2           | 3           | 3           | 3           | 3           | 2           | 5           | 6           | 1           | 1           | 2           |
| 24  | <i>Klebsiella oxytoca</i>       | S2_S11_Klebs             | Norway Outbreak (30)              | 179     | yes                               | 0                                               | 3                                               | 2           | 3           | 3           | 3           | 3           | 2           | 5           | 6           | 1           | 1           | 2           |
| 25  | <i>Klebsiella oxytoca</i>       | S6_Klebs                 | Norway Outbreak (30)              | 179     | yes                               | 0                                               | 3                                               | 2           | 3           | 3           | 3           | 3           | 2           | 5           | 6           | 1           | 1           | 2           |
| 26  | <i>Klebsiella oxytoca</i>       | S7_Klebs                 | Norway Outbreak (30)              | 179     | yes                               | 0                                               | 3                                               | 2           | 3           | 3           | 3           | 3           | 2           | 5           | 6           | 1           | 1           | 2           |
| 27  | <i>Klebsiella oxytoca</i>       | S8_Klebs                 | Norway Outbreak (30)              | 179     | yes                               | 0                                               | 3                                               | 2           | 3           | 3           | 3           | 3           | 2           | 5           | 6           | 1           | 1           | 2           |
| 28  | <i>Klebsiella oxytoca</i>       | S9_Klebs                 | Norway Outbreak (30)              | 179     | yes                               | 0                                               | 3                                               | 2           | 3           | 3           | 3           | 3           | 2           | 5           | 6           | 1           | 1           | 2           |
| 29  | <i>Klebsiella oxytoca</i>       | H4_S7_Klebs              | Norway Outbreak (30)              | 179     | yes                               | 0                                               | 3                                               | 2           | 3           | 3           | 3           | 3           | 2           | 5           | 6           | 1           | 1           | 2           |
| 30  | <i>Klebsiella oxytoca</i>       | H4_S8_Klebs              | Norway Outbreak (30)              | 179     | yes                               | 0                                               | 3                                               | 2           | 3           | 3           | 3           | 3           | 2           | 5           | 6           | 1           | 1           | 2           |
| 31  | <i>Klebsiella oxytoca</i>       | H4_S9_Klebs              | Norway Outbreak (30)              | 179     | yes                               | 0                                               | 3                                               | 2           | 3           | 3           | 3           | 3           | 2           | 5           | 6           | 1           | 1           | 2           |
| 32  | <i>Klebsiella oxytoca</i>       | I7_Klebs                 | Norway Outbreak (30)              | 179     | yes                               | 0                                               | 3                                               | 2           | 3           | 3           | 3           | 3           | 2           | 5           | 6           | 1           | 1           | 2           |
| 33  | <i>Klebsiella michiganensis</i> | NICU-1_S10_Klebs         | Norway Outbreak (30)              | missing | no                                | 12                                              | (not found)                                     | (not found) | (not found) | (not found) | (not found) | (not found) | (not found) | (not found) | (not found) | (not found) | (not found) | (not found) |
| 34  | <i>Klebsiella oxytoca</i>       | NICU-2_Klebs             | Norway Outbreak (30)              | 178     | yes                               | 0                                               | 5                                               | 5           | 6           | 3           | 3           | 6           | 4           | 9           | 9           | 6           | 5           | 2           |
| 35  | <i>Klebsiella grimmontii</i>    | NICU-3_Klebs             | Norway Outbreak (30)              | 215     | yes (hmoX missing)                | 1                                               | 8                                               | 8           | 9           | 7           | 1           | 9           | (not found) | 12          | 12          | 8           | 7           | 1           |
| 36  | <i>Klebsiella grimmontii</i>    | NICU-4_Klebs             | Norway Outbreak (30)              | 467     | yes (hmoX missing)                | 1                                               | 10                                              | 10          | 11          | 1           | 9           | 11          | (not found) | 14          | 12          | 7           | 8           | 1           |
| 37  | <i>Klebsiella grimmontii</i>    | NICU-5_Klebs             | Norway Outbreak (30)              | 168     | yes (hmoX missing)                | 1                                               | 9                                               | 9           | 10          | 1           | 8           | 10          | (not found) | 13          | 3           | 3           | 3           | 1           |
| 38  | <i>Klebsiella michiganensis</i> | E1a_S4_Klebs             | Norway Outbreak (30)              | 202     | no                                | 12                                              | (not found)                                     | (not found) | (not found) | (not found) | (not found) | (not found) | (not found) | (not found) | (not found) | (not found) | (not found) | (not found) |
| 39  | <i>Klebsiella michiganensis</i> | E1b_S18_Klebs            | Norway Outbreak (30)              | 202     | no                                | 12                                              | (not found)                                     | (not found) | (not found) | (not found) | (not found) | (not found) | (not found) | (not found) | (not found) | (not found) | (not found) | (not found) |
| 40  | <i>Klebsiella grimmontii</i>    | NZ_AP014951              | Norway Outbreak Reference         | 263     | yes (hmoX missing)                | 1                                               | 6                                               | 6           | 7           | 5           | 6           | 7           | (not found) | 10          | 10          | 7           | 3           | 1           |
| 41  | <i>Klebsiella oxytoca</i>       | O1-S10-66_Patient2       | Graz Outbreak 2010 (4)            | 199     | no                                | 8                                               | (not found)                                     | (not found) | (not found) | (not found) | (not found) | (not found) | (not found) | 1           | 1           | 1           | 1           | (not found) |
| 42  | <i>Klebsiella oxytoca</i>       | O1-S10-67_Patient1       | Graz Outbreak 2010 (4)            | 199     | no                                | 8                                               | (not found)                                     | (not found) | (not found) | (not found) | (not found) | (not found) | (not found) | 1           | 1           | 1           | 1           | (not found) |
| 43  | <i>Klebsiella oxytoca</i>       | O1-S10-68_Patient3       | Graz Outbreak 2010 (4)            | 199     | no                                | 8                                               | (not found)                                     | (not found) | (not found) | (not found) | (not found) | (not found) | (not found) | 1           | 1           | 1           | 1           | (not found) |
| 44  | <i>Klebsiella oxytoca</i>       | O1-S10-74_Patient4       | Graz Outbreak 2010 (4)            | 199     | no                                | 8                                               | (not found)                                     | (not found) | (not found) | (not found) | (not found) | (not found) | (not found) | 1           | 1           | 1           | 1           | (not found) |
| 45  | <i>Klebsiella oxytoca</i>       | O1-S11-17_Patient5       | Graz Outbreak 2010 (4)            | 199     | no                                | 8                                               | (not found)                                     | (not found) | (not found) | (not found) | (not found) | (not found) | (not found) | 1           | 1           | 1           | 1           | (not found) |
| 46  | <i>Klebsiella oxytoca</i>       | O1-33_Control1           | Graz Outbreak 2010 (4)            | 199     | no                                | 8                                               | (not found)                                     | (not found) | (not found) | (not found) | (not found) | (not found) | (not found) | 1           | 1           | 1           | 1           | (not found) |
| 47  | <i>Klebsiella oxytoca</i>       | O1-S11-55_Control2       | Graz Outbreak 2010 (4)            | 199     | no                                | 8                                               | (not found)                                     | (not found) | (not found) | (not found) | (not found) | (not found) | (not found) | 7           | 1           | 1           | 1           | (not found) |
| 48  | <i>Klebsiella oxytoca</i>       | O2_Patient10_K10         | Graz Outbreak 2013 (7)            | 199     | no                                | 8                                               | (not found)                                     | (not found) | (not found) | (not found) | (not found) | (not found) | (not found) | 1           | 1           | 1           | 1           | (not found) |
| 49  | <i>Klebsiella oxytoca</i>       | O2_Patient11_K11         | Graz Outbreak 2013 (7)            | 199     | no                                | 8                                               | (not found)                                     | (not found) | (not found) | (not found) | (not found) | (not found) | (not found) | 1           | 1           | 1           | 1           | (not found) |
| 50  | <i>Klebsiella oxytoca</i>       | O2_Patient12_K12         | Graz Outbreak 2013 (7)            | 199     | no                                | 8                                               | (not found)                                     | (not found) | (not found) | (not found) | (not found) | (not found) | (not found) | 1           | 1           | 1           | 1           | (not found) |
| 51  | <i>Klebsiella oxytoca</i>       | O2_Patient1_K1           | Graz Outbreak 2013 (7)            | 199     | no                                | 8                                               | (not found)                                     | (not found) | (not found) | (not found) | (not found) | (not found) | (not found) | 1           | 1           | 1           | 1           | (not found) |
| 52  | <i>Klebsiella oxytoca</i>       | O2_Patient3_K3           | Graz Outbreak 2013 (7)            | 199     | no                                | 8                                               | (not found)                                     | (not found) | (not found) | (not found) | (not found) | (not found) | (not found) | 1           | 1           | 1           | 1           | (not found) |
| 53  | <i>Klebsiella oxytoca</i>       | O2_Patient5_K5           | Graz Outbreak 2013 (7)            | 199     | no                                | 8                                               | (not found)                                     | (not found) | (not found) | (not found) | (not found) | (not found) | (not found) | 1           | 1           | 1           | 1           | (not found) |
| 54  | <i>Klebsiella oxytoca</i>       | O2_Patient9_K9           | Graz Outbreak 2013 (7)            | 199     | no                                | 8                                               | (not found)                                     | (not found) | (not found) | (not found) | (not found) | (not found) | (not found) | 1           | 1           | 1           | 1           | (not found) |
| 55  | <i>Klebsiella oxytoca</i>       | O2_Sinks19_Kow13         | Graz Outbreak 2013 (7)            | 199     | no                                | 8                                               | (not found)                                     | (not found) | (not found) | (not found) | (not found) | (not found) | (not found) | 1           | 1           | 1           | 1           | (not found) |
| 56  | <i>Klebsiella oxytoca</i>       | O2_Sinks27_Kow14         | Graz Outbreak 2013 (7)            | 199     | no                                | 8                                               | (not found)                                     | (not found) | (not found) | (not found) | (not found) | (not found) | (not found) | 1           | 1           | 1           | 1           | (not found) |
| 57  | <i>Klebsiella oxytoca</i>       | O2_Sinks39_Kow16         | Graz Outbreak 2013 (7)            | 199     | no                                | 8                                               | (not found)                                     | (not found) | (not found) | (not found) | (not found) | (not found) | (not found) | 1           | 1           | 1           | 1           | (not found) |
| 58  | <i>Klebsiella oxytoca</i>       | O2_Sinks53_Kow17         | Graz Outbreak 2013 (7)            | 199     | no                                | 8                                               | (not found)                                     | (not found) | (not found) | (not found) | (not found) | (not found) | (not found) | 1           | 1           | 1           | 1           | (not found) |
| 59  | <i>Klebsiella oxytoca</i>       | O2_Control217            | Graz Outbreak 2013 (7)            | 199     | no                                | 8                                               | (not found)                                     | (not found) | (not found) | (not found) | (not found) | (not found) | (not found) | 1           | 1           | 1           | 1           | (not found) |
| 60  | <i>Klebsiella oxytoca</i>       | O2_Control353            | Graz Outbreak 2013 (7)            | 199     | no                                | 8                                               | (not found)                                     | (not found) | (not found) | (not found) | (not found) | (not found) | (not found) | 1           | 1           | 1           | 1           | (not found) |
| 61  | <i>Klebsiella oxytoca</i>       | O2_Control402            | Graz Outbreak 2013 (7)            | 199     | no                                | 8                                               | (not found)                                     | (not found) | (not found) | (not found) | (not found) | (not found) | (not found) | 1           | 1           | 1           | 1           | (not found) |
| 62  | <i>Klebsiella pasteurii</i>     | SB-24                    | NCBI Download                     | 322     | yes (Small gene + hmoX missing)   | 2                                               | 13                                              | 13          | 13          | 9           | 11          | 14          | (not found) | 17          | 15          | 9           | (not found) | 5           |
| 63  | <i>Klebsiella grimmontii</i>    | SS141 NZ_CP044527 NZ_CP0 | NCBI Download                     | missing | yes (hmoX missing)                | 1                                               | 15                                              | 15          | 9           | 7           | 1           | 16          | (not found) | 20          | 12          | 8           | 7           | 1           |
| 64  | <i>Klebsiella pasteurii</i>     | Kox205                   | NCBI Download                     | 300     | yes (Small gene + hmoX missing)   | 2                                               | 14                                              | 14          | 14          | 10          | 11          | 15          | (not found) | 18          | 15          | 10          | (not found) | 5           |
| 65  | <i>Klebsiella grimmontii</i>    | RHBSTW-00054 CP055412 CF | NCBI Download                     | 215     | yes (hmoX missing)                | 1                                               | 15                                              | 8           | 15          | 7           | 1           | 16          | (not found) | 19          | 12          | 8           | 7           | 1           |
